# Supplementary material
Source: MDPI journal article supplement (https://www.mdpi.com/2073-4395/12/7/1656)
Supplement: s1 [file s1]

## Supplementary material S1

The age-stage-specific survival rate ( $s_{xj}$ ) indicates the probability that a newly laid egg will survive to age  $x$  and stage  $j$ , and fecundity  $f_{xj}$ , which is the number of hatched eggs produced by adult female at age  $x$ . The age-specific survival rate ( $l_x$ ) is a simplified form of  $s_{xj}$ .

Therefore, age-specific survival rate ( $l_x$ ) was then calculated by following the below equation:

$$l_x = \sum_{j=1}^m s_{xj}$$

Where  $m$  is the number of stages.

Age-specific fecundity ( $m_x$ ) was calculated as follows:

$$m_x = \frac{\sum_{j=1}^m s_{xj} f_{xj}}{\sum_{j=1}^m s_{xj}}$$

Net reproductive rate ( $R_0$ ) is the total number of progeny that a mean female individual can produce throughout the lifetime.

So,  $R_0$  was calculated as follows:

$$R_0 = \sum_{x=0}^{\infty} \sum_{j=1}^m s_{xj} f_{xj}$$

The intrinsic rate of increase ( $r$ ) is the rate of growth of a population as time approaches infinity and population reaches the stable age-stage distribution. The population size will increase at the rate of  $e^r$  per unit time.

Thus,  $r$  was calculated by following the below equation:

$$\sum_{x=0}^{\infty} e^{-r(x+1)} l_x m_x = 1$$

The finite rate of increase ( $\lambda$ ) was then calculated as follows:

$$\lambda = e^r$$

The mean generation time ( $T$ ) represents the time that a population requires to increase to  $R_0$ -fold of its size as time approaches infinity and the population settles down to a stable age-stage distribution.

Therefore,  $T$  was calculated according to the following equation:

$$T = \frac{\ln R_0}{r}$$

Age-stage specific life expectancy ( $e_{xy}$ ) is the duration that an individual of age  $x$  and stage  $y$  is expected to live.

Thus,  $e_{xy}$  was calculated by following the below equation given by Chi and Su [73]:

$$e_{xy} = \sum_{i=x}^n \sum_{j=y}^m s_{ij}^!$$

Where  $s_{ij}^!$  is the probability that an individual of age  $x$  and stage  $y$  will survive to age  $i$  and stage  $j$ .

Reference:

73. Chi, H.; Su, H.Y. Age-stage, two-sex life tables of *Aphidius gifuensis* (Ashmead) (Hymenoptera: Braconidae) and its host *Myzus persicae* (Sulzer) (Homoptera: Aphididae) with mathematical proof of the relationship between female fecundity and the net reproductive rate. *Environ. Entomol.* **2006**, *35*, 10–21. <https://doi.org/10.1603/0046-225X-35.1.10>

**Table S1:** ANOVA of sublethal effect of fluxametamide on *Plutella xylostella* F<sub>0</sub> generation

| Source of Variation             | DF | Sum Square | Mean Square | Significance |
|---------------------------------|----|------------|-------------|--------------|
| 4 <sup>th</sup> instar duration | 2  | 2.033      | 1.017       | **           |
| Pupal duration                  | 2  | 0.187      | 0.094       | **           |
| Pupation rate                   | 2  | 4347.022   | 2173.511    | **           |
| Pupal weight                    | 2  | 5.602      | 2.801       | **           |
| Deformed pupa rate              | 2  | 13.109     | 6.554       | **           |
| Adult emergence                 | 2  | 1120.817   | 560.408     | **           |
| Deformed adult                  | 2  | 101.614    | 50.807      | **           |
| Adult male longevity            | 2  | 36.363     | 18.182      | NS           |
| Adult female longevity          | 2  | 27.547     | 13.774      | **           |
| Female ratio                    | 2  | 103.187    | 51.596      | NS           |
| APOP                            | 2  | 0.445      | 0.223       | **           |

\*\* Significance at  $\leq 0.01$ ; \* Significance at  $\leq 0.05$ ; NS: Not significant

**Table S2:** ANOVA of sublethal effect of fluxametamide on *Plutella xylostella* F<sub>1</sub> treated at F<sub>0</sub> generation

| Source of Variation             | DF | Sum Square | Mean Square | Significance |
|---------------------------------|----|------------|-------------|--------------|
| Egg duration                    | 2  | 5.330      | 2.665       | **           |
| 1 <sup>st</sup> instar duration | 2  | 0.029      | 0.015       | NS           |
| 2 <sup>nd</sup> instar duration | 2  | 0.195      | 0.097       | **           |
| 3 <sup>rd</sup> instar duration | 2  | 0.046      | 0.023       | *            |
| 4 <sup>th</sup> instar duration | 2  | 1.790      | 0.895       | **           |
| Pupal duration                  | 2  | 0.098      | 0.049       | NS           |
| Pupation rate                   | 2  | 4864.278   | 2432.139    | *            |
| Pupal weight                    | 2  | 6.057      | 3.029       | **           |
| Deformed pupa rate              | 2  | 1.596      | 0.798       | **           |
| Adult emergence                 | 2  | 2120.956   | 1060.478    | **           |
| Deformed adult                  | 2  | 158.967    | 79.484      | **           |
| Adult male longevity            | 2  | 19.290     | 9.645       | *            |
| Adult female longevity          | 2  | 11.801     | 5.901       | **           |
| Total male longevity            | 2  | 2.156      | 1.078       | **           |
| Total female longevity          | 2  | 4.669      | 2.335       | **           |
| Female ratio                    | 2  | 277.435    | 138.717     | NS           |

\*\* Significance at  $\leq 0.01$ ; \* Significance at  $\leq 0.05$ ; NS: Not significant
